# Supplementary material for: Increase of Th17 Cell Phenotype in Kidney Transplant Recipients with Chronic Allograft Dysfunction
Source: PubMed Central journal article supplement (PMC4696852; doi:10.1371/journal.pone.0145258), 2015-12-30
Supplement: pone.0145258.s001.pdf [file pone.0145258.s001.pdf]

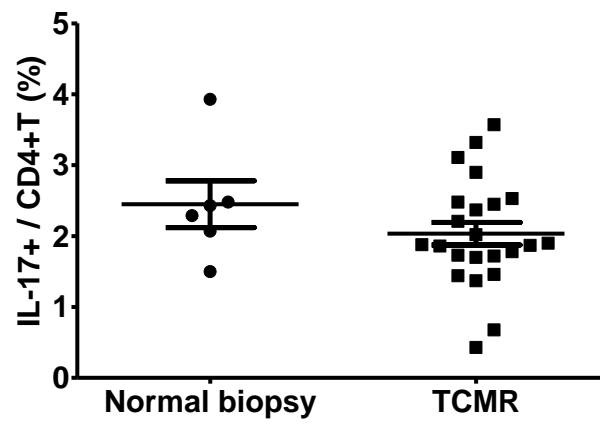

TCMR, T cell mediated rejection
