# Supplementary material for: Increase of Th17 Cell Phenotype in Kidney Transplant Recipients with Chronic Allograft Dysfunction
Source: PubMed Central journal article supplement (PMC4696852; doi:10.1371/journal.pone.0145258), 2015-12-30
Supplement: pone.0145258.s002.pdf [file pone.0145258.s002.pdf]

| Group | IL-17+/CD4+(Th17) | IFN-γ+/CD4+(Th1) | IL-4+/CD4+(Th2) | CD25+Foxp3+/CD4+ T (Treg) | CCR4+ CCR6+/CD4+ T | IL-17+ / CCR6+ CCR4+CD4+T | Effector memory CD4+ T | IL-17+/Effector Memory CD4+ T |
|-------|-------------------|------------------|-----------------|---------------------------|--------------------|---------------------------|------------------------|-------------------------------|
| LTS   | 1.13              | 14.7             | 0.582           | 2.89                      | 6.97               | 11.9                      | 6.58                   | 1.94                          |
| LTS   | 2.37              | 18.8             | 0.901           | 4.23                      | 7.69               | 9.48                      | 11.4                   | 2.38                          |
| LTS   | 1.73              | 7.64             | 1.5             | 8.73                      | 5.57               | 4.28                      | 9.72                   | 4.97                          |
| LTS   | 2.91              | 21.6             | 2.54            | 4.21                      | 15.6               | 7.97                      | 9.73                   | 7.79                          |
| LTS   | 1.63              | 17.4             | 1.76            | 4.14                      | 14.9               | 4.48                      | 8.69                   | 1.83                          |
| LTS   | 2.81              | 18               | 1.07            | 6.49                      | 9.39               | 8.94                      | 11.5                   | 4.83                          |
| LTS   | 1.7               | 18.8             | 1.97            | 5                         | 6.38               | 4.03                      | 7.39                   | 2.85                          |
| LTS   | 1.82              | 9.33             | 2.45            | 3.06                      | 7.07               | 2.9                       | 7.33                   | 1.86                          |
| LTS   | 0.857             | 12.3             | 0.609           | 3.84                      | 8.48               | 6.77                      | 7.25                   | 3.88                          |
| LTS   | 1.85              | 22.1             | 1.65            | 5.79                      | 10.6               | 5.77                      | 15                     | 2.75                          |
| LTS   | 1.58              | 6.82             | 1.55            | 3.23                      | 10.6               | 1.47                      | 6.82                   | 5.37                          |
| LTS   | 2.6               | 18.4             | 1.32            | 5.62                      | 3.46               | 19.1                      | 7.45                   | 4.17                          |
| LTS   | 1.76              | 20.2             | 1.73            | 2.75                      | 8.77               | 11.8                      | 14.3                   | 4.73                          |
| LTS   | 1.81              | 28.6             | 2.24            | 7.43                      | 4.65               | 9.38                      | 11.7                   | 0                             |
| LTS   | 3.38              | 11.7             | 2.35            | 5.03                      | 12.7               | 3.34                      | 9.29                   | 6.28                          |
| LTS   | 2.82              | 4.66             | 0.889           | 6.3                       | 6.7                | 7.65                      | 8.05                   | 3.39                          |
| LTS   | 0.422             | 17.5             | 0.861           | 5.81                      | 20.7               | 3.81                      | 14.6                   | 2.25                          |
| LTS   | 1.46              | 17.2             | 3.23            | 9.71                      | 6.36               | 15.9                      | 8.53                   | 3.97                          |
| LTS   | 3.04              | 39.3             | 1.42            | 5.69                      | 13.7               | 5.69                      | 18                     | 2.62                          |
| LTS   | 1.98              | 26.3             | 4.26            | 1.87                      | 12.4               | 6.12                      | 20.7                   | 6.08                          |
| LTS   | 0.788             | 5.43             | 0.119           | 5.08                      | 5.41               | 7.61                      | 8.62                   | 2.39                          |
| LTS   | 2.38              | 16               | 1.7             | 3.4                       | 7.75               | 5.03                      | 9.99                   | 3.28                          |
| LTS   | 1.9               | 25               | 0.437           | 5.26                      | 7.8                | 11                        | 12.6                   | 6.05                          |
| LTS   | 2.3               | 5.97             | 1.76            | 6.69                      | 11.7               | 9.33                      | 6.14                   | 1.09                          |
| LTS   | 2.73              | 23.3             | 4.65            | 4.01                      | 12.7               | 9.64                      | 13.2                   | 6.28                          |
| LTS   | 0.355             | 22.9             | 0.7             | 3.54                      | 2.33               | 2.33                      | 23.6                   | 2.57                          |
| LTS   | 1.55              | 8.69             | 0.796           | 10.9                      | 14.4               | 14.4                      | 8.25                   | 3.32                          |
| LTS   | 0.585             | 3.81             | 0.2             | 5.592                     | 14.1               | 6.08                      | 16.2                   | 3.62                          |
| LTS   | 1.51              | 31.6             | 1.33            | 6.58                      | 10                 | 6.58                      | 7.77                   | 3.371                         |
| LTS   | 0.721             | 13.4             | 0.5             | 3.36                      | 6.69               | 5.59                      | 9.13                   | 1.63                          |
| LTS   | 0.622             | 12               | 0.387           | 4.05                      | 4.98               | 8.77                      | 8.16                   | 2.09                          |
| LTS   | 1.91              | 15.4             | 1.35            | 8.49                      | 5.11               | 9.31                      | 9.92                   | 4.38                          |
| LTS   | 1.08              | 28.7             | 1.6             | 3.1                       | 5.38               | 10.3                      | 16.1                   | 1.93                          |
| LTS   | 2.47              | 12.3             | 1.81            | 5.27                      | 5.04               | 12.2                      | 10.4                   | 8.07                          |
| LTS   | 2.71              | 17.3             | 2.14            | 5.6                       | 10.7               | 1.47                      | 9.37                   | 4.94                          |
| LTS   | 1.2               | 7.73             | 0.864           | 8.57                      | 6.63               | 6.43                      | 13.2                   | 0                             |
| LTS   | 3.69              | 20.9             | 1.21            | 3.55                      | 6.24               | 6.54                      | 16.5                   | 1.61                          |
| LTS   | 1.42              | 14               | 0.591           | 6.46                      | 4.82               | 6.16                      | 10.8                   | 2.89                          |
| LTS   | 3.84              | 27.9             | 0.646           | 6.43                      | 2.96               | 16.8                      | 12.8                   | 2.89                          |
| LTS   | 1.05              | 17.5             | 0.89            | 7.06                      | 3.96               | 10.7                      | 7.24                   | 4.16                          |

|     |       |       |       |       |       |       |       |       |
|-----|-------|-------|-------|-------|-------|-------|-------|-------|
| LTS | 0.651 | 27.1  | 0.262 | 4.98  | 6.23  | 7.33  | 13.1  | 2.95  |
| LTS | 1.59  | 38.2  | 3.6   | 7.4   | 8.38  | 10.3  | 21.5  | 0     |
| LTS | 1.09  | 11.1  | 0.428 | 5.15  | 9.58  | 2.65  | 18.4  | 3.371 |
| LTS | 0.967 | 18.5  | 0.923 | 5.53  | 13.2  | 10.9  | 10.6  | 2.16  |
| LTS | 1.86  | 7.58  | 1.15  | 7.73  | 16.3  | 3.96  | 6.94  | 2.64  |
| LTS | 3.45  | 30.1  | 1.22  | 3.83  | 7.95  | 3.16  | 14    | 7.29  |
| LTS | 2.63  | 16.2  | 2.46  | 9.18  | 15.3  | 4.43  | 5.64  | 2.11  |
| LTS | 1.56  | 8.77  | 1.36  | 4.71  | 6.62  | 13.9  | 13.5  | 0.973 |
| LTS | 2.37  | 2.99  | 0.562 | 3.8   | 13.6  | 9.27  | 11.9  | 3.36  |
| LTS | 3.92  | 15.5  | 2.1   | 5.3   | 7.7   | 6.5   | 5.3   | 3.11  |
| LTS | 1.5   | 17.2  | 0.246 | 5.592 | 7.37  | 5.42  | 7.65  | 5.88  |
| LTS | 4.8   | 24.3  | 2.47  | 5.04  | 9.94  | 3.81  | 16.9  | 7.89  |
| LTS | 2.43  | 22.1  | 3.51  | 9.28  | 13    | 11.5  | 8.93  | 3     |
| LTS | 2.51  | 16.6  | 1.01  | 7.7   | 7.1   | 6.11  | 5.83  | 3.59  |
| LTS | 1.94  | 21.7  | 1.99  | 5.58  | 6.68  | 3.76  | 9.57  | 0     |
| LTS | 2.55  | 9.74  | 2.46  | 4.79  | 14    | 6.79  | 5.73  | 8.08  |
| LTS | 0.893 | 24.5  | 2.53  | 6.8   | 4.14  | 14.9  | 15.6  | 2.82  |
| LTS | 2.69  | 31.1  | 1.44  | 5.19  | 12.8  | 7.11  | 11.4  | 3.22  |
| LTS | 1.15  | 17.7  | 0.53  | 6.04  | 6.83  | 4.31  | 13.5  | 1.82  |
| LTS | 0.939 | 25.4  | 0.354 | 4.32  | 9.52  | 6.82  | 14.4  | 2.17  |
| LTS | 3.32  | 0.115 | 0.23  | 6.23  | 8.74  | 3.91  | 4.38  | 3.36  |
| LTS | 3.49  | 12    | 0.985 | 5.99  | 6.21  | 7.51  | 8.31  | 3.93  |
| LTS | 0.859 | 21    | 0.343 | 6.09  | 5.53  | 15.4  | 12.5  | 2.49  |
| LTS | 1.39  | 8.82  | 1.87  | 5.44  | 9.13  | 16.3  | 5.21  | 2.33  |
| LTS | 1.74  | 7.84  | 1.54  | 5.58  | 4.13  | 21    | 5.33  | 3.382 |
| LTS | 0.372 | 26.1  | 0.413 | 7.58  | 9.94  | 9.94  | 19.1  | 0.504 |
| LTS | 1.35  | 28.2  | 1.91  | 5.02  | 10.4  | 11.3  | 11.2  | 2.55  |
| CAD | 10.7  | 18.7  | 0.321 | 1.51  | 5.12  | 31.4  | 22.4  | 7.4   |
| CAD | 1.72  | 3.75  | 1.09  | 4.55  | 19.3  | 8.6   | 11.6  | 11    |
| CAD | 1.33  | 19.1  | 2.02  | 2     | 8.78  | 8.7   | 11.8  | 3.11  |
| CAD | 3.57  | 10.6  | 0.863 | 4.72  | 8     | 7.4   | 12.2  | 5.61  |
| CAD | 1.7   | 23.1  | 0.492 | 12.8  | 14.6  | 5.89  | 9.16  | 2.32  |
| CAD | 3.6   | 16.4  | 1.58  | 2.56  | 5.57  | 27.5  | 9.19  | 8.24  |
| CAD | 2.03  | 24    | 0.374 | 13.9  | 11.4  | 8.01  | 12.8  | 3     |
| CAD | 3.225 | 19.72 | 2.22  | 6.13  | 12.3  | 14.9  | 11.61 | 5.969 |
| CAD | 1.38  | 12    | 1.64  | 4.06  | 12.73 | 5.7   | 15.9  | 5     |
| CAD | 1.44  | 11.8  | 0.695 | 9.53  | 22.8  | 5.72  | 9.74  | 2.2   |
| CAD | 2.48  | 11.4  | 1.67  | 5.69  | 12.4  | 14.96 | 11.63 | 5.95  |
| CAD | 4.54  | 18    | 1.04  | 5.62  | 16.9  | 6.2   | 6.83  | 8.9   |
| CAD | 3.96  | 5.54  | 3.78  | 5.07  | 15.9  | 8.43  | 7.9   | 4.34  |
| CAD | 1.38  | 3.48  | 0.949 | 6.13  | 15.4  | 11.7  | 13.7  | 4.55  |
| CAD | 2.66  | 40.7  | 1.691 | 2.03  | 14.5  | 11    | 10.1  | 1.73  |
| CAD | 2.4   | 24    | 1.27  | 6.142 | 20    | 5.38  | 18.8  | 4.86  |

|     |       |       |       |       |       |       |       |       |
|-----|-------|-------|-------|-------|-------|-------|-------|-------|
| CAD | 2.03  | 13.9  | 1.31  | 6.136 | 22.6  | 4.46  | 21.6  | 3.5   |
| CAD | 2.06  | 39.6  | 1.16  | 6.45  | 9.1   | 24.5  | 11.6  | 5.988 |
| CAD | 3.01  | 26    | 1.802 | 3.76  | 14.9  | 7.14  | 9.46  | 8.12  |
| CAD | 3.01  | 26    | 1.691 | 3.76  | 14.9  | 7.14  | 9.46  | 8.12  |
| CAD | 1.57  | 8.55  |       | 2.8   | 12.15 | 14.8  | 11.64 | 5.969 |
| CAD | 2.91  | 35.8  | 4.98  | 3.08  | 1     | 15.06 | 15    | 2.29  |
| CAD | 2.51  | 22.1  | 2.01  | 3.23  | 11.5  | 12.8  | 12.8  | 7.07  |
| CAD | 2.05  | 33.2  |       | 2.1   | 9.2   | 16.8  | 16.7  | 7.06  |
| CAD | 2.38  | 3.48  | 1.69  | 6.136 | 15.4  | 11.7  | 13.7  | 4.55  |
| CAD | 3.48  | 50.8  | 4.9   | 11.2  | 14.13 | 13.3  | 8.08  | 2.01  |
| CAD | 2.17  | 20.5  | 0.599 | 4.89  | 16.9  | 8.22  | 10.7  | 2.27  |
| CAD | 2.16  | 24.8  | 2.77  | 1.34  | 15.11 | 12.7  | 7.79  | 7.3   |
| CAD | 3.16  | 10.1  | 0.927 | 8.97  | 12.7  | 9.22  | 8.36  | 6.77  |
| CAD | 4.15  | 5.44  | 0.15  | 5.65  | 12.7  | 23.6  | 3.17  | 16.9  |
| CAD | 4.25  | 23.2  | 1.3   | 5.29  | 10.7  | 7.2   | 9.62  | 3.5   |
| CAD | 3.02  | 13.3  | 1.74  | 11.5  | 9.29  | 17.2  | 6.58  | 6.2   |
| CAD | 2.61  | 22    | 0.828 | 9.78  | 26    | 11.3  | 12    | 2.83  |
| CAD | 1.894 | 11.5  | 3.16  | 1.13  | 12.6  | 29    | 4.82  | 4.67  |
| CAD | 5.87  | 7.99  |       | 4.4   | 11.6  | 16.1  | 6.98  | 3.65  |
| CAD | 6.7   | 18.1  | 3.52  | 7.64  | 5.75  | 14.2  | 6.42  | 8.21  |
| CAD | 6.62  | 6.67  | 0.893 | 6.58  | 14.8  | 12.8  | 4.57  | 6.17  |
| CAD | 1.58  | 14.3  | 0.726 | 5.6   | 15.5  | 4.62  | 6.86  | 2.27  |
| CAD | 2.74  | 16.4  | 3.78  | 5.48  | 12.3  | 7.32  | 8.42  | 2.7   |
| CAD | 4.72  | 17.1  | 1.43  | 5.54  | 6.44  | 7.43  | 9.79  | 7.06  |
| CAD | 2.27  | 28.2  |       | 4.54  | 8.14  | 9.92  | 7.88  | 4.52  |
| CAD | 2.01  | 32.2  |       | 6.81  | 9.2   | 7.51  | 5.35  | 6.9   |
| CAD | 3.225 | 19.72 | 0.726 | 6.136 | 12.12 | 14.93 | 11.62 | 5.969 |
| CAD | 3.23  | 23.2  | 2.5   | 10.6  | 7.3   | 48.9  | 11.5  | 13.7  |
| CAD | 2.71  | 19.6  |       | 4.72  | 8.3   | 47.9  | 13.7  | 10.7  |
| CAD | 2.96  | 11.2  | 0.224 | 9.94  | 9     | 19.7  | 19.5  | 7.34  |
| CAD | 7     | 17    | 2.8   | 7.78  | 15.1  | 14.2  | 20.9  | 8.87  |
| CAD | 1.83  | 18.3  | 1.72  | 6.81  | 8.25  | 20.2  | 10.4  | 4.1   |
| CAD | 3.67  | 22.2  | 1.67  | 7.71  | 6.19  | 17.9  | 11.9  | 5.16  |
| CAD | 4.03  | 36.5  | 1.68  | 9.85  | 7.08  | 27.8  | 13.4  | 4.62  |
| CAD | 7.25  | 26.5  | 1.7   | 12.8  | 11.2  | 31.2  | 21.8  | 12.6  |
| CAD | 2.73  | 37.5  |       | 6.48  | 5.57  | 26.1  | 25    | 6.54  |
| ES  | 2.73  | 23.5  | 2.38  | 11    | 4.55  | 22    | 0.866 | 7.84  |
| ES  | 2     | 28.4  | 3.45  | 7.35  | 2.75  | 18.3  | 9.43  | 1.89  |
| ES  | 1.1   | 15.3  | 3.12  | 1.86  | 7.36  | 6.72  | 15.8  | 4.38  |
| ES  | 2.42  | 13.4  | 2.334 | 1.12  | 15.7  | 4.85  | 10.8  | 3.31  |
| ES  | 1.04  | 13.4  | 2     | 3.07  | 5.33  | 7.54  | 9.57  | 3.66  |
| ES  | 1.5   | 42    | 2.34  | 9.6   | 9.45  | 6.63  | 24.8  | 3.91  |
| ES  | 2.39  | 32.7  | 1.97  | 3.56  | 6.61  | 25.5  | 28.2  | 8.09  |

|      |       |      |       |       |       |       |       |       |
|------|-------|------|-------|-------|-------|-------|-------|-------|
| ES   | 2.15  | 38.6 | 2.3   | 5.08  | 16.2  | 13.8  | 14.6  | 2.82  |
| ES   | 4.07  | 10.9 | 5.66  | 7.99  | 13    | 19.5  | 7.73  | 4.56  |
| ES   | 0.72  | 6.65 | 2.333 | 4.19  | 11.4  | 7.18  | 9.91  | 2.12  |
| ES   | 3.37  | 11.2 | 2.6   | 6.67  | 5.6   | 5.6   | 13.4  | 5.61  |
| ES   | 2.43  | 29.5 | 1.91  | 6.77  | 18.7  | 16.6  | 13.44 | 5.308 |
| ES   | 3.56  | 19.8 | 1.77  | 8.7   | 8.94  | 7.23  | 10.8  | 3.2   |
| ES   | 3.93  | 13.5 | 2.334 | 5.85  | 4.77  | 13.8  | 20.5  | 9.12  |
| ES   | 3.28  | 11   | 1.41  | 6.31  | 7.94  | 11.85 | 14.4  | 9.12  |
| ES   | 2.76  | 12.8 | 0.664 | 8.13  | 8.02  | 5.24  | 6.8   | 6.19  |
| ES   | 2.11  | 12.8 | 2.13  | 5.41  | 6.63  | 14.1  | 8.77  | 6.19  |
| ES   | 3.11  | 31   | 2.37  | 4.57  | 7.946 | 11.85 | 12.4  | 8.68  |
| ES   | 2.22  | 17.6 | 0.909 | 5.01  | 10.5  | 5.21  | 8     | 9.35  |
| ES   | 1.14  | 5.38 | 2.6   | 5.37  | 3.41  | 3.41  | 10.4  | 3.45  |
| ES   | 1.3   | 32.5 | 2.068 | 1.71  | 17.2  | 10.2  | 23.2  | 3.07  |
| ES   | 1.59  | 21.7 | 1.28  | 1.54  | 11.4  | 6.92  | 20.9  | 0.97  |
| ES   | 2.07  | 14.8 | 2.368 | 3.65  | 1.79  | 16.5  | 7.23  | 7.34  |
| ES   | 1.37  | 15   | 3.83  | 7.24  | 1.46  | 20.3  | 9.91  | 6.04  |
| ES   | 2.29  | 18.2 |       | 7.12  | 4.57  | 20.8  | 7.57  | 9.36  |
| ES   | 1.26  | 10.1 | 2.21  | 5.17  | 2.73  | 15.4  | 19.9  | 9.86  |
| ES   | 0.575 | 37.4 | 2.335 | 5.52  | 3.83  | 12.2  | 29.7  | 1.64  |
| ES   | 0.346 | 11.2 |       | 3.09  | 4.63  | 2.58  | 7.25  | 1.54  |
| ESRD | 1.05  | 26   | 3.84  | 9.03  | 9.2   | 9.73  | 15    | 5.867 |
| ESRD | 1.96  | 21.4 | 8.44  | 8     | 12.5  | 10.9  | 25.5  | 5.86  |
| ESRD | 1.69  | 41.3 | 4.6   | 3.32  | 10.5  | 11.9  | 35.4  | 0.35  |
| ESRD | 1.78  | 16   | 2.05  | 6.62  | 7.32  | 11.4  | 13.3  | 0.76  |
| ESRD | 1.46  | 6.79 | 2.59  | 7.18  | 9.69  | 4.16  | 15.1  | 0.91  |
| ESRD | 1.18  | 26.8 | 3.52  | 8.35  | 17.9  | 6.43  | 27.7  | 3.62  |
| ESRD | 1.74  | 25.8 |       | 8.48  | 19.1  | 12.9  | 14.7  | 5.866 |
| ESRD | 3.01  | 19.9 | 3.08  | 7.48  | 13.5  | 9.82  | 17.63 | 7.71  |
| ESRD | 0.72  | 12.2 | 4.18  | 9.15  | 6.79  | 9.81  | 17.25 | 4.26  |
| ESRD | 1.17  | 25.9 | 3.45  | 7.717 | 7.02  | 10.4  | 18.77 | 3.77  |
| ESRD | 2.39  | 25.1 | 7.1   | 8.98  | 10    | 5.13  | 12.7  | 11.7  |
| ESRD | 2.71  | 25.5 | 1.89  | 9.59  | 9.95  | 7.35  | 13.7  | 7     |
| ESRD | 2.05  | 22.2 | 6.16  | 6.66  | 13.5  | 12.8  | 13.5  | 8.51  |
| ESRD | 1.65  | 20.4 | 4.98  | 10    | 11.7  | 6.07  | 13    | 4.47  |
| ESRD | 1.9   | 18.5 | 1.94  | 12.7  | 19.6  | 10.1  | 14.9  | 5.71  |
| ESRD | 2.84  | 29.3 | 2.45  | 4.48  | 13.4  | 10.6  | 10.8  | 8.65  |
| ESRD | 5.92  | 26.6 | 6.16  | 6.21  | 10.2  | 12.6  | 19.3  | 3.59  |
| ESRD | 3.92  | 7.25 | 1.6   | 8.84  | 11.56 | 10.85 | 17.7  | 12.6  |
| ESRD | 1.46  | 14.3 | 4.28  | 6.91  | 9.06  | 7.02  | 17.94 | 6.14  |
| ESRD | 2.94  | 31.8 | 5.03  | 7.39  | 16.2  | 10.5  | 11.5  | 10.6  |
| ESRD | 4.64  | 31.5 | 3.56  | 8.44  | 17.2  | 11.2  | 25.1  | 18.6  |
| ESRD | 4.19  | 32.4 | 4.95  | 8.07  | 16.1  | 16.1  | 20.7  | 5.872 |

|      |      |       |       |       |       |       |       |       |
|------|------|-------|-------|-------|-------|-------|-------|-------|
| ESRD | 1.85 | 28.6  | 5.08  | 4.93  | 14.2  | 9.24  | 29.7  | 5.865 |
| ESRD | 0.3  | 36.8  | 8.29  | 9.31  | 6.96  | 14.4  | 20.7  | 2.19  |
| ESRD | 1.26 | 21.4  | 2.77  | 10.7  | 11.5  | 11.1  | 16.1  | 4.11  |
| ESRD | 1.04 | 9.7   | 1.49  | 9.85  | 13.8  | 5.32  | 9.26  | 7.81  |
| ESRD | 3.98 | 22.3  | 3.9   | 11.2  | 8.82  | 12.3  | 18    | 8.62  |
| ESRD | 1.72 | 22.4  | 4.61  | 4.99  | 5.18  | 13    | 12    | 4.25  |
| ESRD | 1.02 | 16    | 2.91  | 4.99  | 6.17  | 2.42  | 13.2  | 7.62  |
| ESRD | 1.98 | 18.9  | 5.94  | 5.2   | 12.4  | 10.2  | 29    | 4.08  |
| ESRD | 2.08 | 21.1  | 3.54  | 4.56  | 7.09  | 15.2  | 9.76  | 2.93  |
| ESRD | 3.9  | 24.1  | 1.32  | 8.85  | 18.5  | 10.85 | 16.8  | 5.36  |
| ESRD | 0.85 | 10.9  | 7.55  | 8.95  | 9.97  | 7.54  | 9.93  | 4.75  |
| ESRD | 4.17 | 32.1  | 3.69  | 7.717 | 12.7  | 13.3  | 16.3  | 6.11  |
| ESRD | 2.59 | 25.6  | 2.76  | 3.47  | 9.73  | 10.4  | 15.2  | 5.1   |
| ESRD | 2.46 | 18.1  | 5.23  | 5.73  | 11.6  | 4.86  | 17.63 | 5.09  |
| ESRD | 2.69 | 43.8  | 2.64  | 7.78  | 10.3  | 10.6  | 41.7  | 5.09  |
| ESRD | 4.22 | 35.6  | 3.19  | 8.35  | 8.58  | 15    | 22.7  | 5.866 |
| ESRD | 1.74 | 25.8  | 8.21  | 7.22  | 9.68  | 18.1  | 13    | 2.36  |
| ESRD | 1.36 | 18.6  | 2.18  | 8.29  | 9.11  | 14    | 15.44 | 1.74  |
| ESRD | 1.9  | 29.8  | 8.66  | 8.89  | 8.55  | 10    | 9.01  | 9.58  |
| ESRD | 2.05 | 29.7  | 2.79  | 11.4  | 15    | 17.9  | 16.5  | 4.09  |
| ESRD | 3.53 | 15.2  | 4.26  | 8.36  | 7.39  | 4.71  | 9.09  | 4.53  |
| ESRD | 2.61 | 22.6  | 2.64  | 8.47  | 14.6  | 14.6  | 20.6  | 5.78  |
| ESRD | 2.58 | 48.1  | 8.02  | 4.48  | 16.2  | 25.4  | 20.6  | 8.65  |
| HC   | 1.07 | 13.4  | 1.45  | 7.52  | 7.98  | 12.6  | 7.96  | 4.94  |
| HC   | 1.88 | 20.5  | 2.2   | 9.35  | 7.03  | 14    | 13.7  | 3.63  |
| HC   | 1.97 | 12.8  | 1.09  | 11.9  | 12.9  | 8.82  | 8.27  | 4.92  |
| HC   | 1.16 | 13.9  | 3.51  | 8.63  | 6.75  | 9.08  | 6.66  | 4.41  |
| HC   | 4.09 | 14.3  | 1.55  | 8.69  | 18.7  | 12.5  | 16.5  | 3.57  |
| HC   | 1.81 | 21.8  | 2.43  | 5.41  | 13.2  | 10.4  | 8.17  | 4.4   |
| HC   | 1.74 | 31.2  | 7.28  | 11.7  | 8.46  | 13.8  | 11    | 4.47  |
| HC   | 3    | 12.5  | 1.25  | 11.8  | 12.6  | 10.5  | 9.63  | 4.5   |
| HC   | 0.98 | 27    | 1.79  | 7.33  | 5.59  | 7.12  | 14.1  | 5.1   |
| HC   | 1.67 | 5.41  | 0.55  | 7.01  | 13.6  | 13.6  | 12    | 5.32  |
| HC   | 3.93 | 23.8  | 0.26  | 9.61  | 21.2  | 8.52  | 22.8  | 3.8   |
| HC   | 0.56 | 25.21 | 3.39  | 8.439 | 5.57  | 10.69 | 16.5  | 4.41  |
| HC   | 0.83 | 24.98 | 3     | 8.459 | 8.61  | 10.71 | 8.17  | 3.57  |
| HC   | 0.6  | 14.9  | 2.54  | 2.25  | 9.83  | 5.5   | 11    | 4.4   |
| HC   | 0.74 | 18.9  | 1.24  | 11.5  | 11.8  | 5.15  | 9.63  | 4.1   |
| HC   | 1.4  | 28.93 | 4.98  | 14    | 21.21 | 7.11  | 14.1  | 3.8   |
| HC   | 1.28 | 17.2  | 1.76  | 4.98  | 11.27 | 10.72 | 12    | 4.5   |
| HC   | 1.42 | 22.6  | 0.058 | 4.79  | 12.9  | 6.3   | 22.8  | 5.32  |
| HC   | 1.04 | 31.5  | 1.84  | 3.01  | 7.76  | 20.8  | 11.88 | 4.8   |
| HC   | 1.38 | 20.3  | 5.24  | 3.73  | 11.5  | 9.39  | 4.09  | 3.8   |

|    |      |      |      |       |      |      |      |       |
|----|------|------|------|-------|------|------|------|-------|
| HC | 1.6  | 21.8 | 2.16 | 8.429 | 12.9 | 5.88 | 7.84 | 3.983 |
| HC | 2.04 | 16.2 | 1.64 | 14.1  | 9.94 | 15.6 | 11   | 0.38  |
| HC | 1.81 | 11   | 3.05 | 6.1   | 6.48 | 14.4 | 13.7 | 1.88  |
| HC | 2.44 | 21.1 | 2.24 | 7.78  | 6.6  | 15.1 | 10.6 | 3.76  |
| HC | 2.16 | 26.3 | 5.83 | 11.2  | 11.9 | 9.1  | 14.2 | 1.87  |
| HC | 2.52 | 21.7 | 1.73 | 11.7  | 16.7 | 11   | 10.6 | 3.93  |
